# Supplementary material for: An oxo-bacteriochlorin derivative for long-wavelength fluorescence ratiometric alcohol sensing
Source: Royal Society of Chemistry journal article supplement (doi:10.1039/c0an00173b), 2010-01-01
Supplement: c0an00173b.pdf [file c0an00173b.pdf]

## Supplementary Information

### An Oxo-Bacteriochlorin Derivative for Long-Wavelength Fluorescence Ratiometric Alcohol Sensing

Kosuke Takano, Shin-ichi Sasaki, Daniel Citterio, Hitoshi Tamiaki and Koji Suzuki

#### Synthesis and spectral characterization of the fluororeceptor docosyl 3-trifluoroacetyl-8-oxo-bacteriochlorin (BC-1)

##### General

$^1\text{H}$ -,  $^{13}\text{C}$ - and  $^{19}\text{F}$ -NMR spectra were recorded on a JEOL JNM-600HR spectrometer in  $\text{CDCl}_3$ . Chemical shifts are reported relative to the residual solvent peak or the external standard:  $\delta = 7.26$  ppm ( $\text{CHCl}_3$ ) for  $^1\text{H}$ -NMR,  $\delta = 77.0$  ppm ( $^{13}\text{CDCl}_3$ ) for  $^{13}\text{C}$ -NMR, and  $-77.0$  ppm ( $\text{CF}_3\text{COOD}$ ) for  $^{19}\text{F}$ -NMR. Proton peaks were assigned by  $^1\text{H}$ - $^1\text{H}$  COSY and NOESY or ROESY spectra, and carbon signals except for quaternary peaks were assigned by DEPT and  $^{13}\text{C}$ - $^1\text{H}$  COSY spectra. Electronic absorption and fluorescence emission spectra were measured on Hitachi U-3500 and F-4500 spectrophotometers, respectively. Fluorescent emission quantum yield was determined at room temperature using a Hamamatsu Photonics absolute PL quantum yield measurement system C9920-02. FT-IR spectra in  $\text{CH}_2\text{Cl}_2$  were measured with a Jasco FT/IR 6200 spectrometer. Atmospheric pressure chemical ionization (APCI) quadrupole mass spectra (MS) and high resolution (HR) fast atomic bombardment (FAB) MS were measured by a Shimadzu LCMS-2010 EV apparatus and a JEOL GCmate II

spectrometer, respectively. APCI-MS samples were injected as MeOH solutions. A FAB-MS sample for HRMS measurement was dissolved in CH<sub>2</sub>Cl<sub>2</sub>, *m*-nitrobenzyl alcohol and glycerol were used as the matrix, and PEG1000 was added as an external reference. GPC was performed with recycling preparative high-performance liquid chromatography LC-908 (Japan Analytical Industry) with a connected polystyrene packed column (Jaigel 1H) using CHCl<sub>3</sub> as an eluent.

1,3-Dichlorotetrabutyl distannoxane [(Bu<sub>2</sub>ClSn)<sub>2</sub>O] was purchased from Aldrich. 1-Docosanol and osmium tetroxide were purchased from Tokyo Chemical Industry and Nacalai Tesque, respectively. Methyl 3-trifluoroacetyl-3-devinyl-pyropheophorbide-*a* (**1**) was prepared as previously reported.<sup>S1</sup>

### **Docosyl 3-trifluoroacetyl-8-oxo-bacteriochlorin BC-1 (3)**

The synthesis route for the fluororeceptor **BC-1** is outlined in Scheme S1. According to the reported procedure,<sup>S2</sup> 3-trifluoroacetyl-chlorin **1** (278 mg, 0.45 mmol) was reacted with OsO<sub>4</sub> (ca. 200 mg) in CH<sub>2</sub>Cl<sub>2</sub> and pyridine, then the resulting osmium ester was cleaved by H<sub>2</sub>S. The crude product was roughly purified by a short column of silica gel column (MeOH-CH<sub>2</sub>Cl<sub>2</sub>, 1:19) to give the corresponding 7,8-*cis*-dihydroxy-bacteriochlorin (180 mg, 61%) as a stereoisomeric mixture, which was used without further purification. VIS (CH<sub>2</sub>Cl<sub>2</sub>) λ<sub>max</sub> 762 (relative intensity, 73%), 549 (28), 356 nm (100); MS (APCI) *m/z* 653 (M+H<sup>+</sup>), 685 (M+MeOH+H<sup>+</sup>).

The above *cis*-diol (163 mg, 0.25 mmol) was dissolved in CF<sub>3</sub>COOH (20 ml), and the mixture was stirred for 30 min at room temperature. The mixture was poured into water and extracted with CH<sub>2</sub>Cl<sub>2</sub>. The extract was washed with brine, dried over anhydrous Na<sub>2</sub>SO<sub>4</sub>, filtered, and concentrated. The crude product was purified by silica gel chromatography (Et<sub>2</sub>O-CH<sub>2</sub>Cl<sub>2</sub>, 1:9) to give **2** (75 mg, 47%) as a 7-epimeric mixture.

VIS (CH<sub>2</sub>Cl<sub>2</sub>)  $\lambda_{\max}$  736 (relative intensity, 70%), 556 (17), 397 nm (100); VIS (EtOH)  $\lambda_{\max}$  685 (relative intensity, 47%), 626 (16), 532 (13), 502 (13), 384 nm (100); <sup>1</sup>H-NMR  $\delta$  = 9.42/9.41 (1H, s, 10-H), 8.96 (1H, s, 5-H), 8.69 (1H, s, 20-H), 5.17, 5.02 (each 1H, d,  $J$  = 20 Hz, 13<sup>1</sup>-CH<sub>2</sub>), 4.42 (1H, q,  $J$  = 7 Hz, 18-H), 4.23 (1H, d,  $J$  = 9 Hz 17-H), 3.65/3.64 (3H, s, 12-CH<sub>3</sub>), 3.58 (3H, s, COOCH<sub>3</sub>), 3.56 (3H, s, 2-CH<sub>3</sub>), 2.66, 2.58, 2.33, 2.23 (1H+3H+1H+1H, m, 7-CH<sub>2</sub> and 17-CH<sub>2</sub>CH<sub>2</sub>), 1.89/1.87 (3H, s, 7-CH<sub>3</sub>), 1.79 (3H, d,  $J$  = 7 Hz, 18-CH<sub>3</sub>), 0.48/0.47 (3H, t,  $J$  = 7 Hz, 7<sup>1</sup>-CH<sub>3</sub>), 0.13, -1.08 (each 1H, br-s, NH); MS (APCI)  $m/z$  635 (M+H<sup>+</sup>), 667 (M+MeOH+H<sup>+</sup>).

According to the reported procedure,<sup>S3</sup> transesterification of **2** (30 mg, 0.047 mmol) was performed with 1-docosanol (164 mg, 0.50 mmol) and [(Bu<sub>2</sub>ClSn)<sub>2</sub>O] (13 mg, 0.02 mmol) in toluene (20 ml). The crude product was purified by silica gel chromatography (Et<sub>2</sub>O-CH<sub>2</sub>Cl<sub>2</sub>, 1:49) followed by GPC to give **3** (35 mg, 82%) as a 7-epimeric mixture. VIS (EtOH)  $\lambda_{\max}$  685 (relative intensity, 46%), 625 (16), 532 (13), 502 (13), 384 nm (100);  $\lambda_{\text{flu}}$ (EtOH) 696 nm;  $\Phi_{\text{EtOH}}$  = 0.12; <sup>1</sup>H-NMR  $\delta$  = 9.423/9.419 (1H, s, 10-H), 8.96 (1H, s, 5-H), 8.68 (1H, s, 20-H), 5.18, 5.02 (each 1H, d,  $J$  = 20 Hz, 13<sup>1</sup>-CH<sub>2</sub>), 4.43 (1H, dq,  $J$  = 2, 7 Hz, 18-H), 4.23 (1H, br-d,  $J$  = 9 Hz 17-H), 4.41 (2H, m, 17<sup>2</sup>-COOCH<sub>2</sub>), 3.58 (3H, s, 2-CH<sub>3</sub>), 3.56 (3H, s, 12-CH<sub>3</sub>), 2.66, 2.59, 2.32, 2.24 (1H+3H+1H+1H, m, 7-CH<sub>2</sub> and 17-CH<sub>2</sub>CH<sub>2</sub>), 1.89/1.87 (3H, s, 7-CH<sub>3</sub>), 1.78 (3H, d,  $J$  = 7 Hz, 18-CH<sub>3</sub>), 1.51 (2H, m, 17<sup>2</sup>-COOCCH<sub>2</sub>), 1.23-1.19 (38H, m, 17<sup>2</sup>-COOC<sub>2</sub>(CH<sub>2</sub>)<sub>19</sub>), 0.87 (3H, t,  $J$  = 7 Hz, 17<sup>2</sup>-COOC<sub>21</sub>CH<sub>3</sub>), 0.48/0.47 (3H, t,  $J$  = 7 Hz, 7<sup>1</sup>-CH<sub>3</sub>), 0.12, -1.09 (each 1H, br-s, NH); <sup>13</sup>C-NMR  $\delta$  = 208.8 (C13<sup>1</sup>), 195.0 (C8), 182.2 (q, <sup>2</sup> $J_{\text{C-F}}$  = 38 Hz, C3<sup>1</sup>), 172.9, 170.6, 167.3, 160.7, 148.4, 145.5, 140.1, 138.2, 138.1, 136.4, 131.6, 128.8, 126.8 (C1, 2, 3, 4, 6, 9, 11, 12, 13, 14, 16, 17<sup>3</sup>, 19), 116.4 (q, <sup>1</sup> $J_{\text{C-F}}$  = 289 Hz, C3<sup>2</sup>), 110.3 (C15), 100.3 (C10), 97.3 (C20), 95.0 (C5), 64.9 (C17<sup>5</sup>), 55.84/55.81 (C7), 51.5 (C17), 49.7 (C18), 47.7 (C13<sup>2</sup>), 31.9, 31.5, 31.4, 31.0, 29.71,

29.66, 29.63, 29.58, 29.5, 29.4, 29.3, 29.2, 28.52, 28.50, 25.8, 23.07, 23.06, 22.7, 22.63, 22.57 (7-CH<sub>2</sub>, 7-CH<sub>3</sub>, C17<sup>1</sup>, C17<sup>2</sup>, C17<sup>6</sup>-C17<sup>25</sup>, several peaks appear to overlap at 29.6 ppm), 14.1 (C17<sup>26</sup>), 12.9 (q, <sup>5</sup>J<sub>C-F</sub> = 3 Hz, C2<sup>1</sup>), 11.8 (C12<sup>1</sup>), 8.8 (C7<sup>2</sup>); <sup>19</sup>F-NMR δ = -79.66 (s, 3<sup>1</sup>-CF<sub>3</sub>); IR (CH<sub>2</sub>Cl<sub>2</sub>) ν 1711, 1697, 1622 cm<sup>-1</sup>; MS (APCI) m/z 930 (M+H<sup>+</sup>), 962 (M+MeOH+H<sup>+</sup>); HRMS (FAB) m/z 929.5762 (MH<sup>+</sup>), calcd for C<sub>55</sub>H<sub>75</sub>F<sub>3</sub>N<sub>4</sub>O<sub>5</sub> 929.5768.

#### References

- S1 S. Sasaki and H. Tamiaki, *Tetrahedron Lett.*, 2006, **47**, 4849-4852.
- S2 S. Sasaki, M. Omoda, and H. Tamiaki, *J. Photochem. Photobiol. A: Chem.*, 2004, **162**, 307-315.
- S3 S. Sasaki and H. Tamiaki, *Tetrahedron Lett.*, 2006, **47**, 4965-4968.

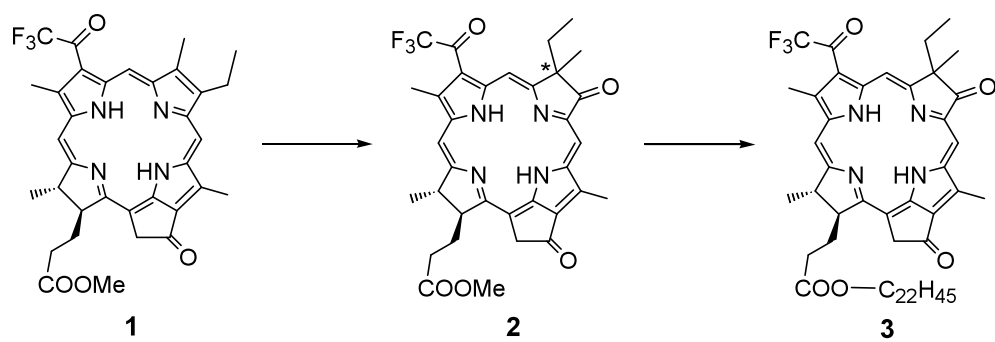

**Scheme S1.** Synthesis route for the fluororeceptor **BC-1 (3)**.

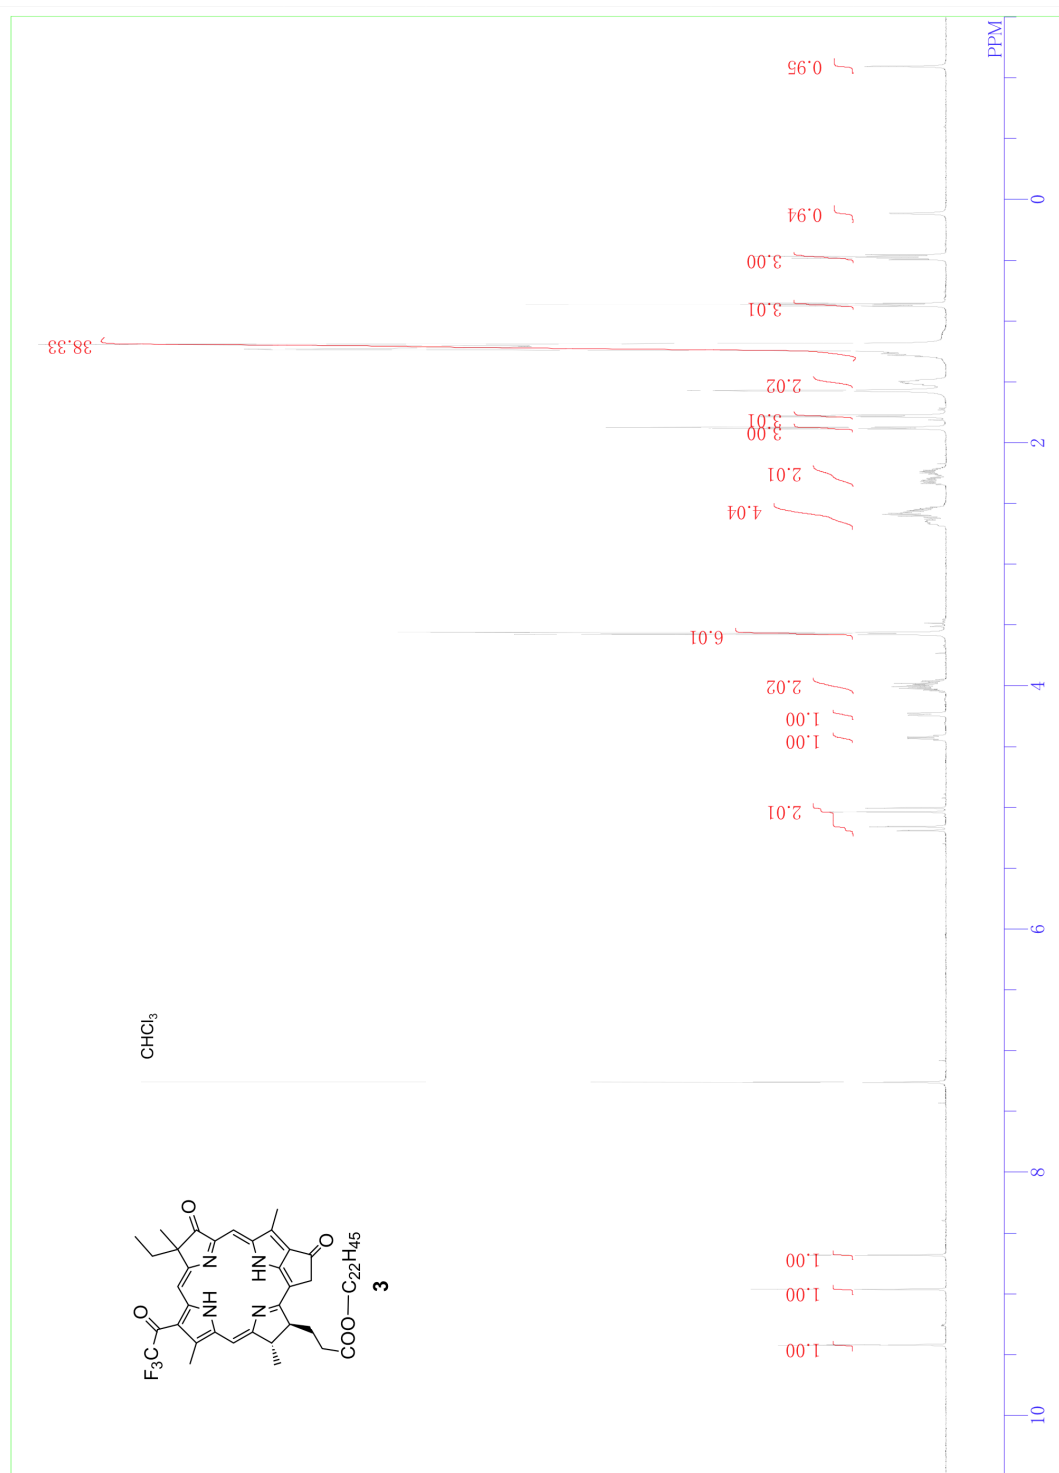

**Figure S1.** <sup>1</sup>H-NMR spectrum of bacteriochlorin **3** in CDCl<sub>3</sub>.

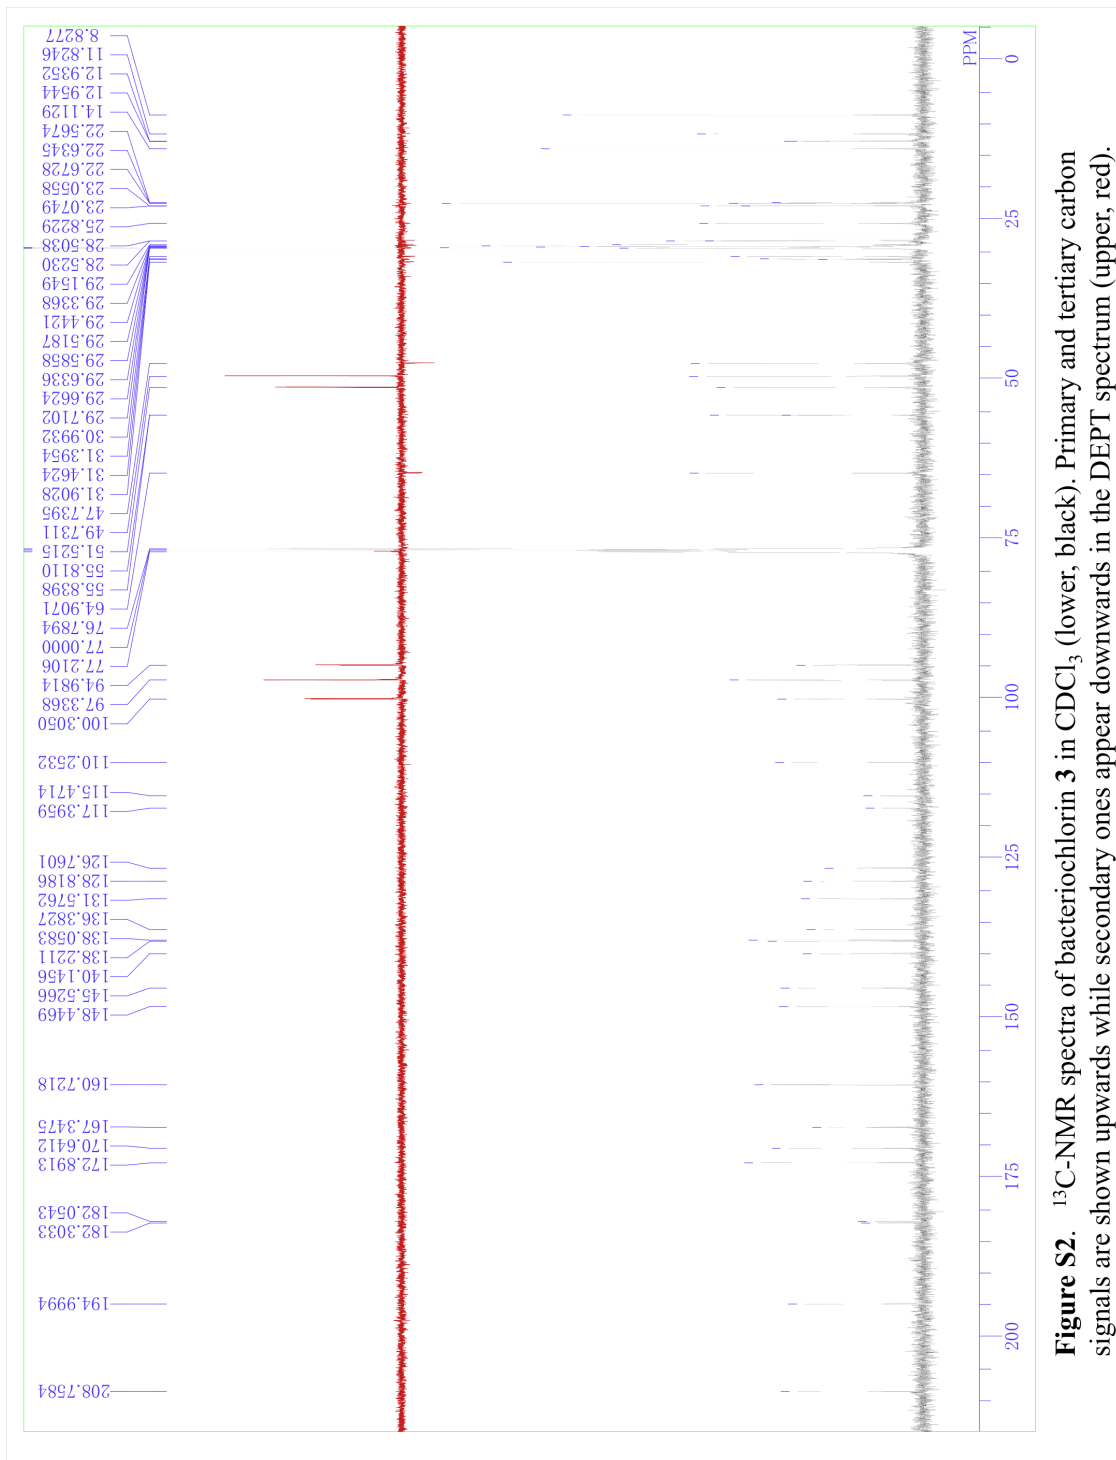

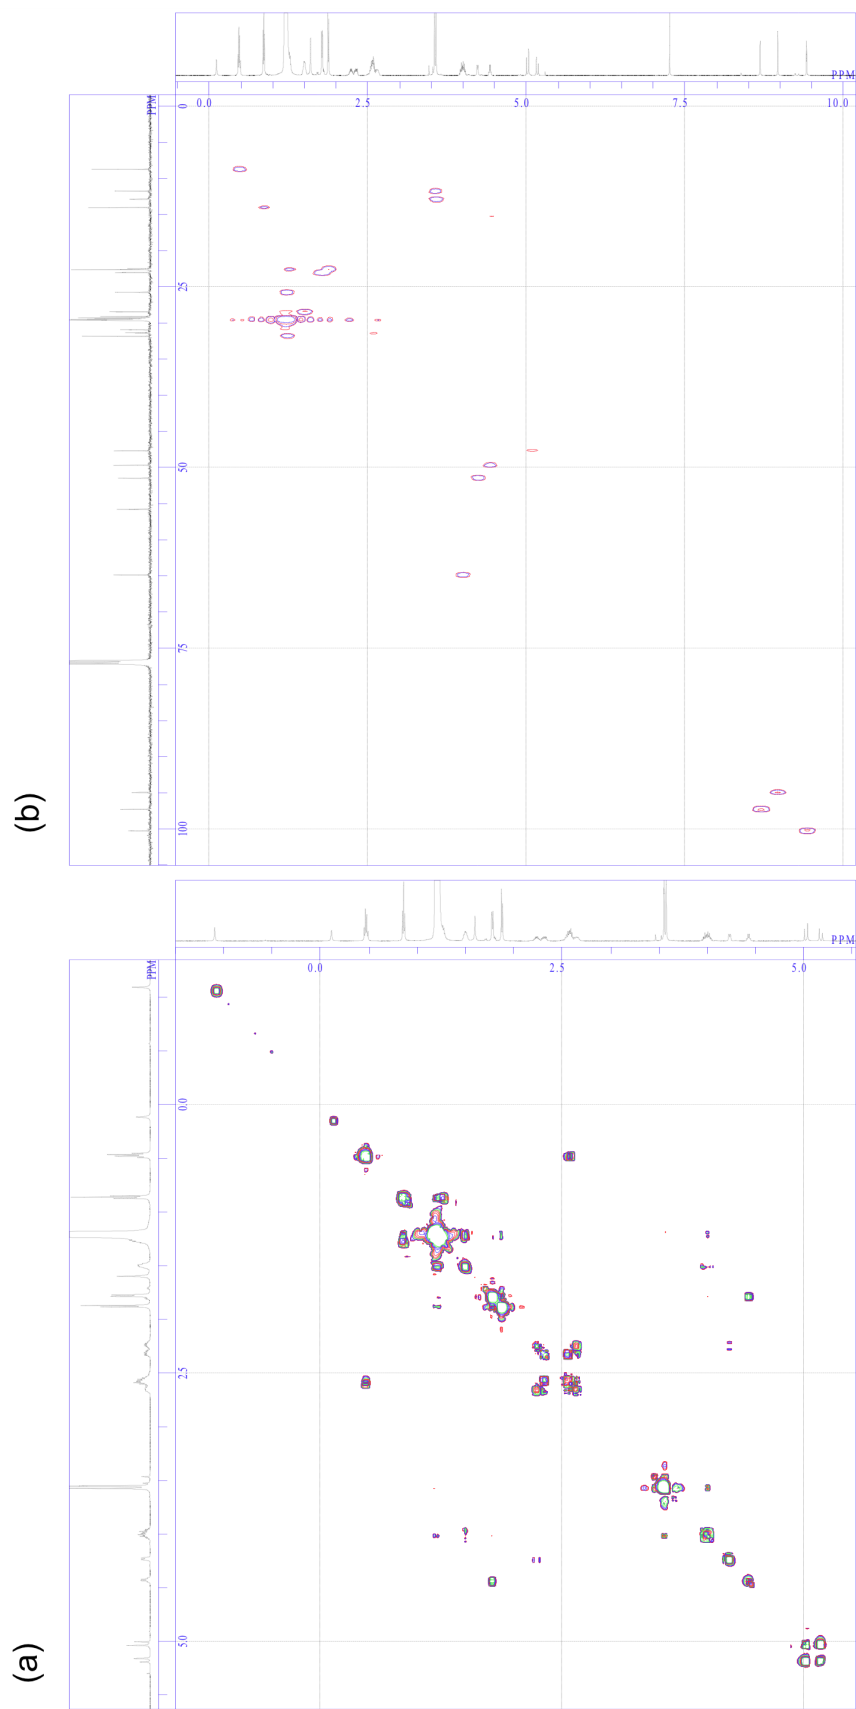

**Figure S3.** Selected region of (a)  $^1\text{H}$ - $^1\text{H}$  and (b)  $^1\text{H}$ - $^{13}\text{C}$  COSY spectra of bacteriochlorin **3** in  $\text{CDCl}_3$ .



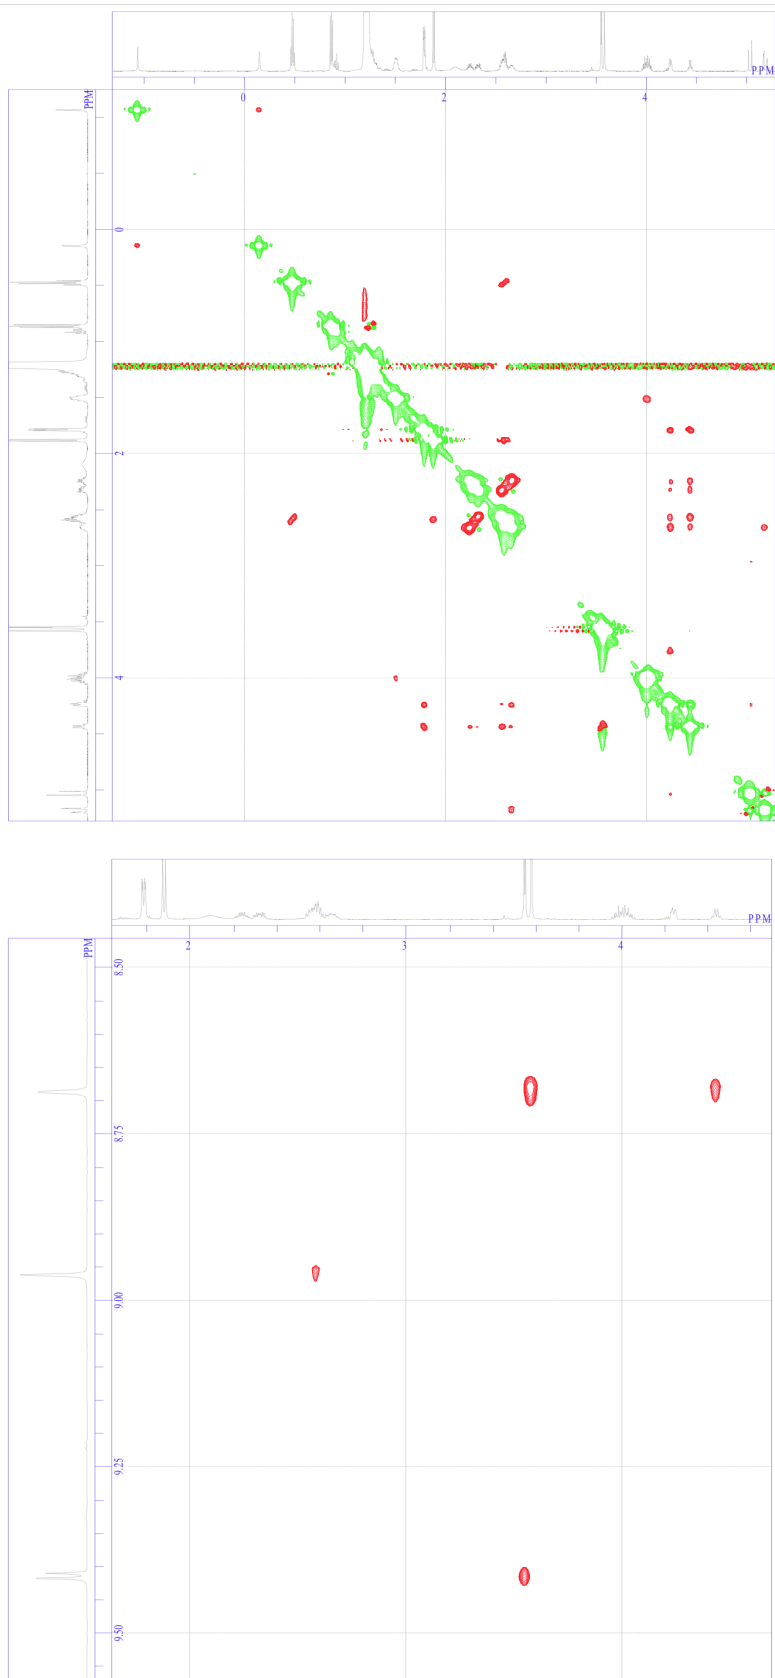

**Figure S4.** Selected region of ROESY spectra of bacteriochlorin 3 in CDCl<sub>3</sub>.

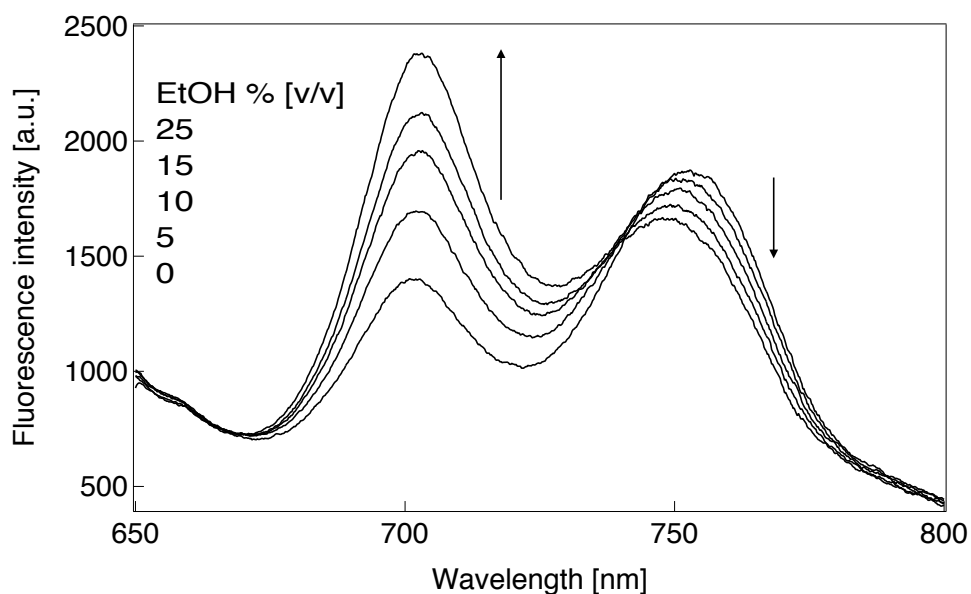

**Figure S5a.** Fluorescence emission spectra of an ethanol sensing membrane of composition M2 (35 mol% TDMACl) upon continuous flow (0.5 ml/min) exposure to phosphate-buffered (pH 6.8) aqueous ethanol solutions (exc. 631 nm).

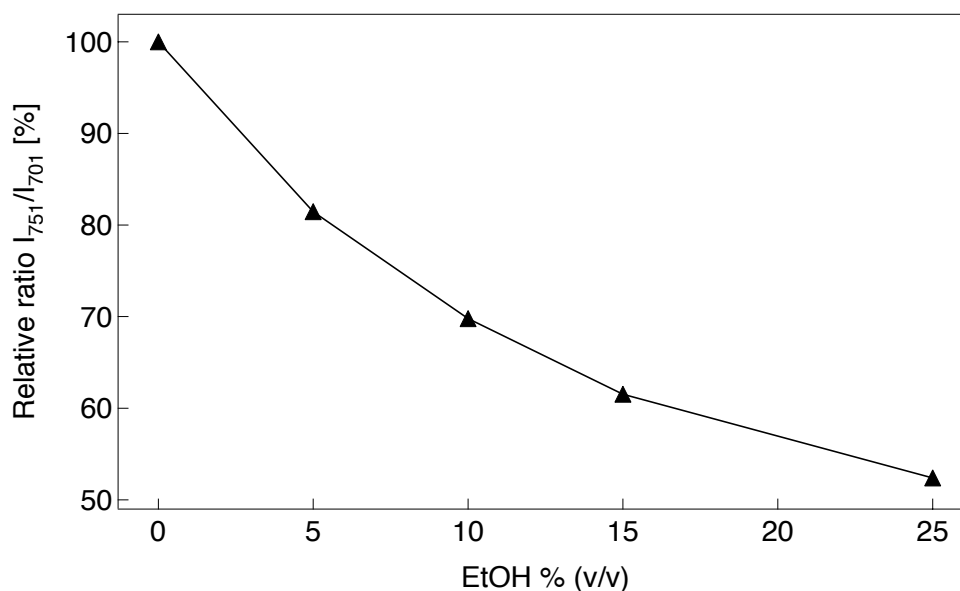

**Figure S5b.** Relative changes of the ratiometric emission signal ( $I_{751 \text{ nm}} / I_{701 \text{ nm}}$ ) for a membrane of composition M2 excited at 631 nm in response to aqueous ethanol solutions (phosphate buffer at pH 6.8); based on data from Fig. S5a.

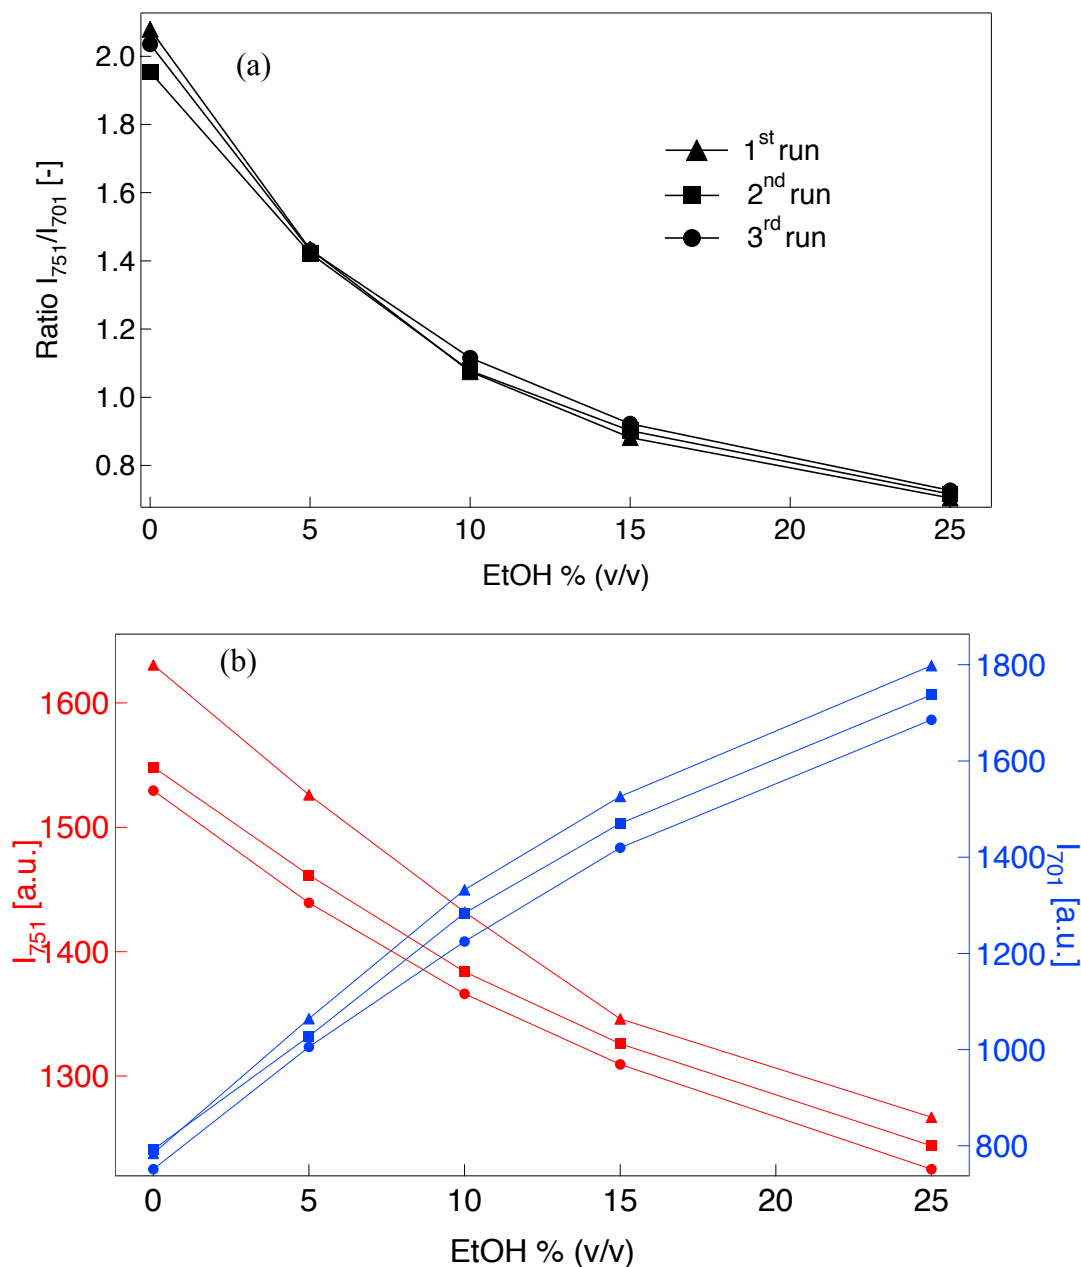

**Figure S6.** (a) Absolute changes in the ratiometric signal ( $I_{751 \text{ nm}} / I_{701 \text{ nm}}$ ), and (b) in the emission signal at 701 nm and at 751 nm for a membrane of composition M2 excited at 431 nm upon repeated and continuous exposure (0.5 ml/min flow) to aqueous ethanol solutions (phosphate buffer at pH 6.8):  $\blacktriangle$  1<sup>st</sup> run (0 – 190 min),  $\blacksquare$  2<sup>nd</sup> run (240 – 400 min),  $\bullet$  3<sup>rd</sup> run (450 – 600 min); the sensor membrane was continuously flushed with ethanol-free buffer solution between the single runs.
